# Supplementary material for: Recovery of the N,N-Dibutylimidazolium Chloride Ionic Liquid from Aqueous Solutions by Electrodialysis Method
Source: MDPI journal article supplement (doi:10.3390/ijms23126472), 2022-06-09
Supplement: s1 [file s1]

## Supplementary materials

# Recovery of the *N,N*-Dibutylimidazolium Chloride Ionic Liquid from Aqueous Solutions by Electrodialysis Method

Dorota Babilas <sup>1,\*</sup>, Anna Kowalik-Klimczak <sup>2</sup> and Anna Mielańczyk <sup>3</sup>

<sup>1</sup> Department of Inorganic, Analytical Chemistry and Electrochemistry, Faculty of Chemistry, Silesian University of Technology, B. Krzywoustego 6, 44-100 Gliwice, Poland

<sup>2</sup> Bioeconomy and Eco-Innovation Centre, Łukasiewicz Research Network—The Institute for Sustainable Technologies, Pułaskiego 6/10, 26-600 Radom, Poland

<sup>3</sup> Department of Physical Chemistry and Technology of Polymers, Faculty of Chemistry, Silesian University of Technology, M. Strzody 9, 44-100 Gliwice, Poland

\* Correspondence: dorota.babilas@polsl.pl; Tel.: +48-32-237-24-90

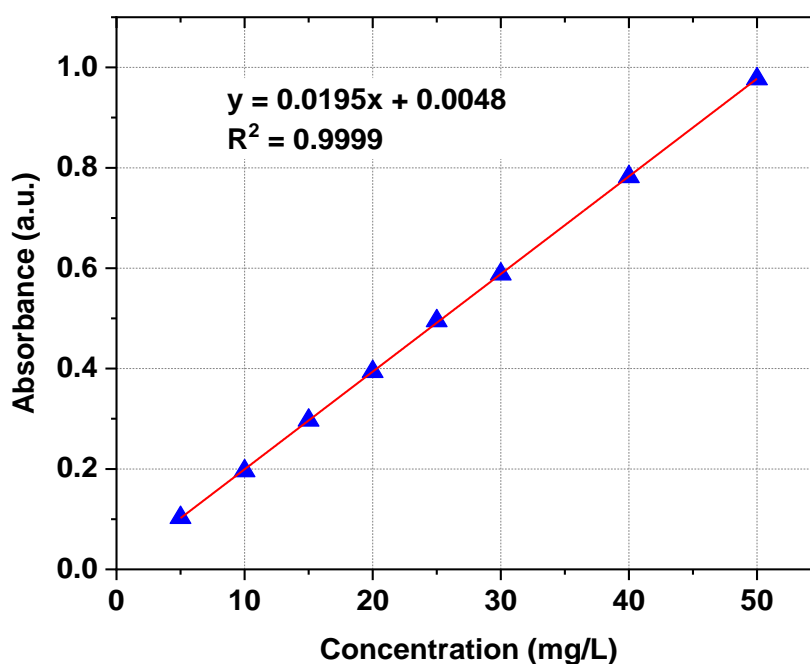

Figure S1. The standard curve between the concentration and absorbance of  $[C_4C_4IM]Cl$ .
